# Supplementary material for: Bile-Based Cell-Free DNA Analysis Is a Reliable Diagnostic Tool in Pancreatobiliary Cancer
Source: PubMed Central journal article supplement (PMC7818177; doi:10.3390/cancers13010039), 2020-12-25
Supplement: cancers-13-00039-s001.pdf [file cancers-13-00039-s001.pdf]

# **Bile-Based Cell-Free DNA Analysis Is a Reliable Diagnostic Tool in Pancreatobiliary Cancer**

**Caroline Driescher, Katharina Fuchs, Lena Haeberle, Wolfgang Goering, Lisa Frohn, Friederike V. Opitz, Dieter Haeussinger, Wolfram Trudo Knoefel, Verena Keitel and Irene Esposito**

**Table S1.** Detailed information on patient collective

| ID | Diagnosis           | Tumor/ cyst localization    | Bile available | Plasma available | Tissue available | CA 19-9 [U/ml] | Concordance in NGS results between tissue and plasma | Concordance in NGS results between tissue and bile | Concordance in NGS results between plasma and bile |
|----|---------------------|-----------------------------|----------------|------------------|------------------|----------------|------------------------------------------------------|----------------------------------------------------|----------------------------------------------------|
| 1  | Localized PDAC      | Pancreatic head             | yes            | yes              | yes              | 758.4          | yes*                                                 | yes                                                | yes*                                               |
| 2  | IPMN                | Pancreatic head             | no             | yes              | no               | 25.9           | -                                                    | -                                                  | -                                                  |
| 3  | Pseudocysts         | Pancreatic head/ body/ tail | no             | yes              | no               | -              | -                                                    | -                                                  | -                                                  |
| 4  | Metastatic PDAC     | Pancreatic head             | yes            | yes              | yes              | >10000         | yes*                                                 | yes                                                | yes*                                               |
| 6  | Pseudocysts         | Pancreatic head             | no             | yes              | no               | -              | -                                                    | -                                                  | -                                                  |
| 8  | PSC                 | -                           | yes            | yes              | no               | 136.2          | -                                                    | -                                                  | yes                                                |
| 9  | Localized PDAC      | Pancreatic head             | yes            | no               | yes              | 34.4           | -                                                    | yes                                                | -                                                  |
| 10 | Metastatic CCA      | Extrahepatic                | yes            | yes              | yes              | >10000         | no                                                   | yes                                                | no                                                 |
| 11 | Metastatic PDAC     | Pancreatic head             | no             | yes              | no               | >10000         | -                                                    | -                                                  | -                                                  |
| 12 | Metastatic PDAC     | Pancreatic head             | yes            | yes              | yes              | >10000         | yes                                                  | yes                                                | yes                                                |
| 13 | CBD obstruction     | -                           | yes            | no               | no               | 167.0          | -                                                    | -                                                  | -                                                  |
| 14 | Metastatic PDAC     | Pancreatic head             | no             | yes              | yes              | 809.7          | yes*                                                 | -                                                  | -                                                  |
| 15 | Metastatic PDAC     | Pancreatic head             | no             | yes              | no               | 2298.0         | -                                                    | -                                                  | -                                                  |
| 16 | Choledocholithiasis | -                           | yes            | yes              | no               | -              | -                                                    | -                                                  | yes                                                |
| 17 | Metastatic PDAC     | Pancreatic body             | no             | yes              | yes              | 230.4          | yes                                                  | -                                                  | -                                                  |
| 18 | Metastatic PDAC     | Pancreatic head             | no             | yes              | no               | 14.7           | -                                                    | -                                                  | -                                                  |
| 20 | Localized PDAC      | Pancreatic head             | yes            | yes              | yes              | 123.6          | no                                                   | yes                                                | no                                                 |
| 22 | CBD obstruction     | -                           | yes            | no               | no               | -              | -                                                    | -                                                  | -                                                  |
| 23 | Metastatic PDAC     | Pancreatic head             | yes            | no               | yes              | 188.4          | -                                                    | yes*                                               | -                                                  |
| 25 | Localized PDAC      | Pancreatic head             | yes            | no               | yes              | 8849.0         | -                                                    | yes                                                | -                                                  |
| 27 | Localized CCA       | Intrahepatic                | no             | yes              | yes              | 62.3           | no                                                   | -                                                  | -                                                  |
| 28 | Metastatic PDAC     | Pancreatic head             | no             | yes              | yes              | 1476.0         | yes                                                  | -                                                  | -                                                  |
| 29 | Metastatic PDAC     | Pancreatic head             | yes            | yes              | no               | -              | -                                                    | -                                                  | yes                                                |
| 31 | Metastatic PDAC     | Pancreatic head             | no             | yes              | no               | 893.0          | -                                                    | -                                                  | -                                                  |
| 32 | PSC                 | -                           | yes            | no               | no               | 16.9           | -                                                    | -                                                  | -                                                  |
| 33 | Localized CCA       | Extrahepatic                | no             | yes              | yes              | 193.8          | no                                                   | -                                                  | -                                                  |
| 34 | CBD obstruction     | -                           | yes            | no               | no               | -              | -                                                    | -                                                  | -                                                  |
| 35 | CBD obstruction     | -                           | yes            | no               | no               | 32.1           | -                                                    | -                                                  | -                                                  |
| 36 | Metastatic PDAC     | Pancreatic head             | no             | yes              | yes              | 238.5          | no                                                   | -                                                  | -                                                  |
| 37 | Metastatic PDAC     | Pancreatic head             | no             | yes              | no               | 22.6           | -                                                    | -                                                  | -                                                  |
| 38 | Localized CCA       | Intrahepatic                | no             | yes              | yes              | 8.2            | yes                                                  | -                                                  | -                                                  |
| 40 | Metastatic PDAC     | Pancreatic head             | yes            | yes              | yes              | 3508.0         | yes*                                                 | yes                                                | yes*                                               |
| 41 | Localized PDAC      | Pancreatic head             | yes            | yes              | yes              | 1310.0         | no                                                   | yes                                                | no                                                 |

|    |                      |                                |     |     |     |        |     |     |      |
|----|----------------------|--------------------------------|-----|-----|-----|--------|-----|-----|------|
| 42 | Metastatic PDAC      | Pancreatic head                | no  | yes | no  | -      | -   | -   | -    |
| 43 | Localized PDAC       | Pancreatic head                | no  | yes | yes | 1574.0 | no  | -   | -    |
| 44 | Localized PDAC       | Pancreatic head                | yes | yes | no  | 117.1  | -   | -   | yes* |
| 46 | Metastatic PDAC      | Pancreatic tail                | no  | yes | yes | 20.1   | yes | -   | -    |
| 47 | Localized PDAC       | Pancreatic head                | no  | yes | yes | 47.6   | no  | -   | -    |
| 48 | Metastatic PDAC      | Pancreatic body                | yes | no  | no  | 12.8   | -   | -   | -    |
| 49 | Metastatic PDAC      | Pancreatic head                | yes | no  | no  | >10000 | -   | -   | -    |
| 50 | CBD obstruction      | -                              | yes | no  | no  | -      | -   | -   | -    |
| 51 | Metastatic PDAC      | Pancreatic head                | no  | yes | yes | 77.9   | no  | -   | -    |
| 54 | Chronic pancreatitis | -                              | yes | no  | no  | -      | -   | -   | -    |
| 55 | CBD obstruction      | -                              | yes | no  | no  | 264.5  | -   | -   | -    |
| 56 | Chronic pancreatitis | -                              | no  | yes | no  | -      | -   | -   | -    |
| 57 | Localized CCA        | Extrahepatic                   | yes | no  | no  | 87.1   | -   | -   | -    |
| 58 | Choledocholithiasis  | -                              | yes | no  | no  | -      | -   | -   | -    |
| 59 | CBD obstruction      | -                              | yes | no  | no  | -      | -   | -   | -    |
| 60 | Chronic pancreatitis | -                              | no  | yes | no  | -      | -   | -   | -    |
| 61 | Chronic pancreatitis | -                              | no  | yes | no  | -      | -   | -   | -    |
| 62 | Chronic pancreatitis | -                              | no  | yes | no  | -      | -   | -   | -    |
| 65 | Metastatic PDAC      | Pancreatic head                | yes | yes | yes | >10000 | yes | yes | yes  |
| 66 | PSC                  | -                              | yes | no  | no  | -      | -   | -   | -    |
| 67 | Pseudocysts          | Pancreatic head                | yes | no  | no  | -      | -   | -   | -    |
| 68 | Pseudocyst           | Pancreatic head                | no  | yes | no  | -      | -   | -   | -    |
| 70 | Choledocholithiasis  | -                              | yes | no  | no  | -      | -   | -   | -    |
| 71 | Metastatic PDAC      | Pancreatic tail                | no  | yes | no  | 8346.0 | -   | -   | -    |
| 72 | Localized PDAC       | Pancreatic head                | no  | yes | yes | 30.5   | no  | -   | -    |
| 73 | IPMNs                | Pancreatic head/<br>body/ tail | no  | yes | no  | -      | -   | -   | -    |
| 75 | Chronic pancreatitis | -                              | no  | yes | no  | 53.1   | -   | -   | -    |
| 76 | IPMN                 | Pancreatic body/<br>tail       | no  | yes | no  | -      | -   | -   | -    |
| 77 | IPMNs                | Pancreatic body/<br>tail       | no  | yes | no  | 9.4    | -   | -   | -    |
| 79 | Localized CCA        | Extrahepatic                   | yes | yes | yes | 303.1  | no  | yes | no   |
| 80 | Metastatic CCA       | Intrahepatic                   | no  | yes | yes | 7.4    | yes | -   | -    |
| 83 | Metastatic PDAC      | Pancreatic head                | yes | no  | no  | >10000 | -   | -   | -    |
| 84 | Pseudocyst           | Pancreatic head                | no  | yes | no  | 6.7    | -   | -   | -    |
| 86 | Metastatic PDAC      | Pancreatic head                | yes | yes | yes | 293.0  | yes | yes | yes  |
| 87 | CBD obstruction      | -                              | yes | no  | no  | -      | -   | -   | -    |
| 88 | Metastatic CCA       | Intrahepatic                   | yes | no  | yes | -      | -   | yes | -    |
| 89 | Chronic pancreatitis | -                              | yes | no  | no  | -      | -   | -   | -    |
| 90 | CBD obstruction      | -                              | yes | no  | no  | 43.2   | -   | -   | -    |

|     |                     |                          |     |     |     |        |     |   |      |
|-----|---------------------|--------------------------|-----|-----|-----|--------|-----|---|------|
| 91  | Metastatic CCA      | Extrahepatic             | no  | yes | yes | 2699.0 | yes | - | -    |
| 92  | PSC                 | -                        | no  | yes | no  | 6.8    | -   | - | -    |
| 93  | Choledocholithiasis | -                        | yes | no  | no  | -      | -   | - | -    |
| 94  | Localized CCA       | Intrahepatic             | no  | yes | yes | 17.4   | no  | - | -    |
| 96  | CBD obstruction     | -                        | yes | no  | no  | -      | -   | - | -    |
| 98  | Metastatic PDAC     | Pancreatic head          | yes | yes | no  | 1993.0 | -   | - | yes* |
| 99  | Metastatic PDAC     | Pancreatic head/<br>body | no  | yes | no  | -      | -   | - | -    |
| 100 | PSC                 | -                        | yes | no  | no  | 360.2  | -   | - | -    |
| 101 | Localized PDAC      | Pancreatic head          | no  | yes | no  | 181.1  | -   | - | -    |

\* NGS analysis revealed at least one concordant mutation



|    |            |             |   |            |   |   |             |   |   |
|----|------------|-------------|---|------------|---|---|-------------|---|---|
| 36 | p.Gly12Asp | -           | - | -          | - | - | p.Arg201Cys | - | - |
| 37 | -          | -           | - | -          | - | - | -           | - | - |
| 40 | p.Gly12Val | p.Tyr107fs  | - | -          | - | - | -           | - | - |
| 42 | -          | -           | - | -          | - | - | -           | - | - |
| 46 | p.Gly12Val | -           | - | -          | - | - | -           | - | - |
| 48 | p.Gly12Asp | p.Arg175His | - | -          | - | - | -           | - | - |
| 49 | p.Gly12Arg | -           | - | -          | - | - | -           | - | - |
| 51 | p.Gly12Val | p.Arg175His | - | p.His83Tyr | - | - | -           | - | - |
| 65 | p.Gly12Val | -           | - | -          | - | - | -           | - | - |
| 71 | p.Gly12Val | -           | - | -          | - | - | p.Arg201His | - | - |
| 83 | p.Gly12Val | -           | - | p.Asp84Gly | - | - | -           | - | - |
| 86 | -          | -           | - | -          | - | - | -           | - | - |
| 98 | p.Gly12Asp | p.Tyr234Asn | - | p.His83Tyr | - | - | -           | - | - |
| 99 | -          | -           | - | -          | - | - | -           | - | - |

\*Mutation in splice site

**Table S3.** FFPE Tissue used for DNA Extraction.

| Patient ID             | Tissue type                          | Procedure                                    |
|------------------------|--------------------------------------|----------------------------------------------|
| <b>Localized CCA</b>   |                                      |                                              |
| 27                     | primary lesion liver                 | Left hemihepatectomy                         |
| 33                     | primary lesion liver                 | Liver segment resection                      |
| 38                     | primary lesion liver                 | Percutaneous liver biopsy                    |
| 79                     | primary lesion liver                 | Liver segment resection                      |
| 94                     | primary lesion liver                 | Right hemihepatectomy                        |
| <b>Localized PDAC</b>  |                                      |                                              |
| 1                      | primary lesion pancreas              | Pylorus-preserving pancreaticoduodenectomy   |
| 9                      | primary lesion pancreas              | Pylorus-preserving pancreaticoduodenectomy   |
| 20                     | primary lesion pancreas              | Pylorus-preserving pancreaticoduodenectomy   |
| 25                     | primary lesion pancreas              | Pylorus-preserving pancreaticoduodenectomy   |
| 41                     | primary lesion pancreas              | Total pancreatectomy                         |
| 43                     | primary lesion pancreas              | Pancreaticoduodenectomy                      |
| 47                     | primary lesion pancreas              | Pylorus-preserving pancreaticoduodenectomy   |
| 72                     | primary lesion pancreas              | Pylorus-preserving pancreaticoduodenectomy   |
| <b>Metastatic CCA</b>  |                                      |                                              |
| 10                     | metastatic lesion lung               | Lung segment resection                       |
| 80                     | metastatic lesion liver              | Percutaneous liver biopsy                    |
| 88                     | metastatic lesion liver              | Percutaneous liver biopsy                    |
| 91                     | metastatic lesion falciform ligament | Exploratory laparoscopy                      |
| <b>Metastatic PDAC</b> |                                      |                                              |
| 4                      | metastatic lesion liver              | Percutaneous liver biopsy                    |
| 12                     | metastatic lesion liver              | Percutaneous liver biopsy                    |
| 14                     | metastatic lesion liver              | Percutaneous liver biopsy                    |
| 17                     | metastatic lesion liver              | Exploratory laparoscopy                      |
| 23                     | metastatic lesion liver              | Percutaneous liver biopsy                    |
| 28                     | metastatic lesion liver              | Percutaneous liver biopsy                    |
| 36                     | metastatic lesion peritoneum         | Percutaneous laparoscopic peritoneal biopsy  |
| 40                     | primary lesion pancreas              | EUS-guided forceps biopsy of pancreatic head |
| 46                     | metastatic lesion liver              | Percutaneous liver biopsy                    |
| 51                     | primary lesion pancreas              | Pylorus-preserving pancreaticoduodenectomy   |
| 65                     | metastatic lesion liver              | Percutaneous liver biopsy                    |
| 86                     | metastatic lesion liver              | Percutaneous liver biopsy                    |
